# Supplementary material for: Understanding and Improving Older People’s Well-Being through Social Prescribing Involving the Cultural Sector: Interviews from a Realist Evaluation
Source: PubMed Central journal article supplement (PMC10262332; doi:10.1177/07334648231154043), 2023-02-01
Supplement: sj-pdf-6-jag-10.1177_07334648231154043.pdf [file sj-pdf-6-jag-10.1177_07334648231154043.pdf]

## COREQ (Consolidated criteria for REporting Qualitative research) Checklist

A checklist of items that should be included in reports of qualitative research

| Topic                                          | Item No. | Guide Questions/ Description                                                                                                                             | Author Responses                                                                                                                                                   |
|------------------------------------------------|----------|----------------------------------------------------------------------------------------------------------------------------------------------------------|--------------------------------------------------------------------------------------------------------------------------------------------------------------------|
| <b>Domain 1: Research team and reflexivity</b> |          |                                                                                                                                                          |                                                                                                                                                                    |
| <u>Personal Characteristics</u>                |          |                                                                                                                                                          |                                                                                                                                                                    |
| Interviewer/facilitator                        | 1        | Which author/s conducted the interview or focus group?                                                                                                   | This is described in the methods section                                                                                                                           |
| Credentials                                    | 2        | What were the researcher's credentials?<br>E.g. PhD, MD                                                                                                  | Background of researchers is described in the methods section                                                                                                      |
| Occupation                                     | 3        | What was their occupation at the time of the study?                                                                                                      | This information is in the methods, in the section on data collection                                                                                              |
| Gender                                         | 4        | Was the researcher male or female?                                                                                                                       | This information is in the methods, in the section on data collection                                                                                              |
| Experience and training                        | 5        | What experience or training did the researcher have?                                                                                                     | One has an MSc in anthropology and another has a PhD in medical anthropology                                                                                       |
| <u>Relationship with participants</u>          |          |                                                                                                                                                          |                                                                                                                                                                    |
| Relationship established                       | 6        | Was a relationship established prior to study commencement?                                                                                              | Due to the collection of data during the pandemic, this was not possible                                                                                           |
| Participant knowledge of the interviewer       | 7        | What did the participants know about the researcher? e.g. personal goals, reasons for doing the research                                                 | Participants were told that we were doing this study to try and understand how older people might benefit from using the cultural sector for health and well-being |
| Interviewer characteristics                    | 8        | What characteristics were reported about the interviewer/facilitator? e.g. Bias, assumptions, reasons and interests in the research topic                | Some details have been reported in the methods section – the researchers conducting data collection and analysis were employed to work on the project              |
| <b>Domain 2: Study design</b>                  |          |                                                                                                                                                          |                                                                                                                                                                    |
| <u>Theoretical framework</u>                   |          |                                                                                                                                                          |                                                                                                                                                                    |
| Methodological orientation and Theory          | 9        | What methodological orientation was stated to underpin the study? e.g. grounded theory, discourse analysis, ethnography, phenomenology, content analysis | This was part of a realist evaluation                                                                                                                              |
| Sampling                                       | 10       | How were participants selected? e.g. purposive, convenience,                                                                                             | Purposive sampling was undertaken                                                                                                                                  |

|                              |    |                                                                                   |                                                                                                                                                                                                                                                                                    |
|------------------------------|----|-----------------------------------------------------------------------------------|------------------------------------------------------------------------------------------------------------------------------------------------------------------------------------------------------------------------------------------------------------------------------------|
|                              |    | consecutive, snowball                                                             |                                                                                                                                                                                                                                                                                    |
| Method of approach           | 11 | How were participants approached? e.g. face-to-face, telephone, mail, email       | They were contacted via email (though gatekeepers/contacts)                                                                                                                                                                                                                        |
| Sample size                  | 12 | How many participants were in the study?                                          | 25 cultural sector staff and 28 older people                                                                                                                                                                                                                                       |
| Non-participation            | 13 | How many people refused to participate or dropped out? Reasons?                   | No one dropped out or refused to get involved once they had contacted the researchers about taking part – the invitation may have been sent to a number of people who decided not to get involved and did not contact the research team – however, we do not have this information |
| <u>Setting</u>               |    |                                                                                   |                                                                                                                                                                                                                                                                                    |
| Setting of data collection   | 14 | Where was the data collected? e.g. home, clinic, workplace                        | Data were collected via telephone or Microsoft Teams                                                                                                                                                                                                                               |
| Presence of non-participants | 15 | Was anyone else present besides the participants and researchers?                 | No                                                                                                                                                                                                                                                                                 |
| Description of sample        | 16 | What are the important characteristics of the sample? e.g. demographic data, date | Older people (aged 60 or older) and cultural sector providers                                                                                                                                                                                                                      |
| <u>Data collection</u>       |    |                                                                                   |                                                                                                                                                                                                                                                                                    |
| Interview guide              | 17 | Were questions, prompts, guides provided by the authors? Was it pilot tested?     | We provide some details of questions asked<br>Questions were shared with our patient-public involvement group in advance of conducting interviews                                                                                                                                  |
| Repeat interviews            | 18 | Were repeat interviews carried out? If yes, how many?                             | No                                                                                                                                                                                                                                                                                 |
| Audio/visual recording       | 19 | Did the research use audio or visual recording to collect the data?               | Interviews were audio-recorded with participants' consent                                                                                                                                                                                                                          |
| Field notes                  | 20 | Were field notes made during and/or after the interview or focus group?           | No                                                                                                                                                                                                                                                                                 |
| Duration                     | 21 | What was the duration of the interviews or focus group?                           | Interviews lasted between 30-60 minutes                                                                                                                                                                                                                                            |
| Data saturation              | 22 | Was data saturation discussed?                                                    | The sample size was informed, to some extent, by the time we had available to conduct this project - we feel that towards the end of data collection we were not learning                                                                                                          |

|                                        |    |                                                                                                                                 |                                                                                                                                                                                                                              |
|----------------------------------------|----|---------------------------------------------------------------------------------------------------------------------------------|------------------------------------------------------------------------------------------------------------------------------------------------------------------------------------------------------------------------------|
|                                        |    |                                                                                                                                 | vastly new things to inform the programme theory, so had reached a point of data redundancy                                                                                                                                  |
| Transcripts returned                   | 23 | Were transcripts returned to participants for comment and/or corrections?                                                       | No                                                                                                                                                                                                                           |
| <b>Domain 3: analysis and findings</b> |    |                                                                                                                                 |                                                                                                                                                                                                                              |
| <i>Data analysis</i>                   |    |                                                                                                                                 |                                                                                                                                                                                                                              |
| Number of data coders                  | 24 | How many data coders coded the data?                                                                                            | Two researchers were involved in the intensive coding stage - they shared their ideas with the project leads (3 other people) and then the wider research team (all authors) for comment and feedback                        |
| Description of the coding tree         | 25 | Did authors provide a description of the coding tree?                                                                           | We describe how context-mechanism-outcome configurations were developed as this was part of a realist evaluation                                                                                                             |
| Derivation of themes                   | 26 | Were themes identified in advance or derived from the data?                                                                     | There was deductive and inductive coding involved as we had a programme theory from a previous realist review, but inductive coding was used when parts of the data did not fit elements from this previous programme theory |
| Software                               | 27 | What software, if applicable, was used to manage the data?                                                                      | NVIVO                                                                                                                                                                                                                        |
| Participant checking                   | 28 | Did participants provide feedback on the findings?                                                                              | No                                                                                                                                                                                                                           |
| <i>Reporting</i>                       |    |                                                                                                                                 |                                                                                                                                                                                                                              |
| Quotations presented                   | 29 | Were participant quotations presented to illustrate the themes/findings? Was each quotation identified? e.g. participant number | Yes                                                                                                                                                                                                                          |
| Data and findings consistent           | 30 | Was there consistency between the data presented and the findings?                                                              | Yes                                                                                                                                                                                                                          |
| Clarity of major themes                | 31 | Were major themes clearly presented in the findings?                                                                            | Yes                                                                                                                                                                                                                          |
| Clarity of minor themes                | 32 | Is there a description of diverse cases or discussion of minor themes?                                                          | We present the main concepts that were incorporated into a revised programme theory as this work was                                                                                                                         |

|  |  |  |                                 |
|--|--|--|---------------------------------|
|  |  |  | related to a realist evaluation |
|--|--|--|---------------------------------|

Developed from: Tong A, Sainsbury P, Craig J. Consolidated criteria for reporting qualitative research (COREQ): a 32-item checklist for interviews and focus groups. *International Journal for Quality in Health Care*. 2007. Volume 19, Number 6: pp. 349 – 357
