# Supplementary material for: Understanding and Improving Older People’s Well-Being through Social Prescribing Involving the Cultural Sector: Interviews from a Realist Evaluation
Source: J Appl Gerontol. 2023 Feb 1;42(7):1466–76. doi: 10.1177/07334648231154043 (PMC10262332; doi:10.1177/07334648231154043)
Supplement: Supplemental Material—Understanding and Improving Older People’s Well-Being through Social Prescribing Involving the Cultural Sector: Interviews from a Realist Evaluation [file sj-pdf-2-jag-10.1177_07334648231154043.pdf]

***Supplementary file 2: Example questions asked in interviews (however, they were semi-structured so the questions asked varied depending on topics raised by participants)***

| <b><i>Older people</i></b>                                                                                                                                                                                                                                                                                                                                                                                                                                                                                                                                                                         | <b><i>Cultural sector staff</i></b>                                                                                                                                                                                                                                                                                                                                                                                                                                                                                                              |
|----------------------------------------------------------------------------------------------------------------------------------------------------------------------------------------------------------------------------------------------------------------------------------------------------------------------------------------------------------------------------------------------------------------------------------------------------------------------------------------------------------------------------------------------------------------------------------------------------|--------------------------------------------------------------------------------------------------------------------------------------------------------------------------------------------------------------------------------------------------------------------------------------------------------------------------------------------------------------------------------------------------------------------------------------------------------------------------------------------------------------------------------------------------|
| <ul style="list-style-type: none"> <li>• How might places like museums, libraries and botanical gardens support people's health and well-being?</li> <li>• What might stop older people using museums, libraries and botanical gardens?</li> <li>• How can museums, libraries and botanical gardens be used to help people to connect to others?</li> <li>• How might online cultural activities differ to those that take place in person?</li> <li>• What do you understand by the term 'social prescribing'? How might museums, libraries and botanical gardens play a role in this?</li> </ul> | <ul style="list-style-type: none"> <li>• What is your organisation doing to support the well-being of older people?</li> <li>• How has what you offer to the public changed/been affected by COVID-19?</li> <li>• What connection, if at all, does your organisation have with social prescribing/LWs?</li> <li>• What are the potential risks or negative consequences of organisations like your own attempting to support older people's well-being?</li> <li>• How do you assess if what you are doing helps people's well-being?</li> </ul> |
